# Supplementary material
Source: PubMed Central journal article supplement (PMC2738420)

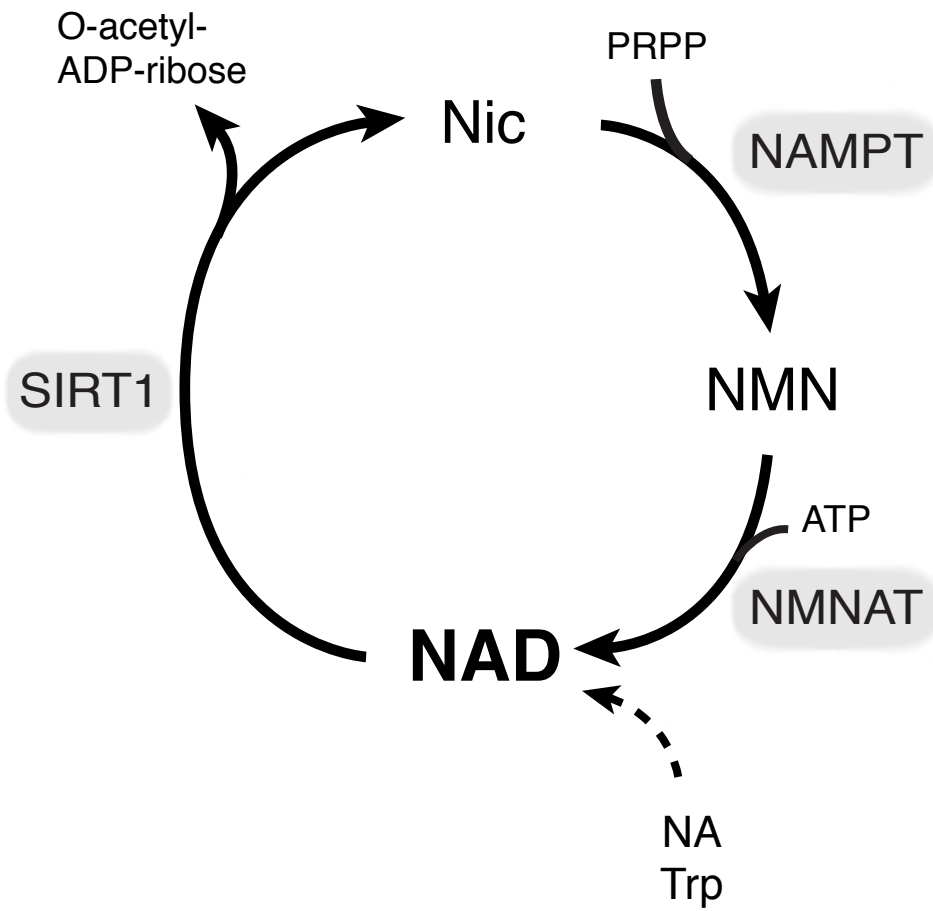

Figure S1

Supplement: NIHMS128744-supplement-Figure_S1.pdf [file NIHMS128744-supplement-Figure_S1.pdf]

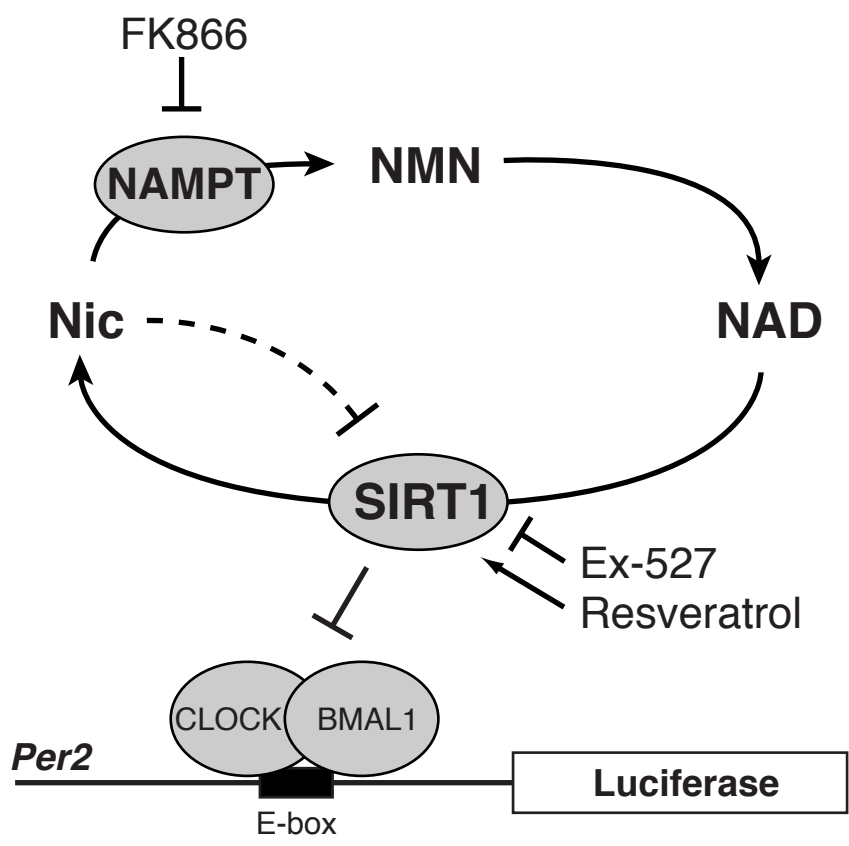

Figure S2

Supplement: NIHMS128744-supplement-Figure_S2.pdf [file NIHMS128744-supplement-Figure_S2.pdf]

**A**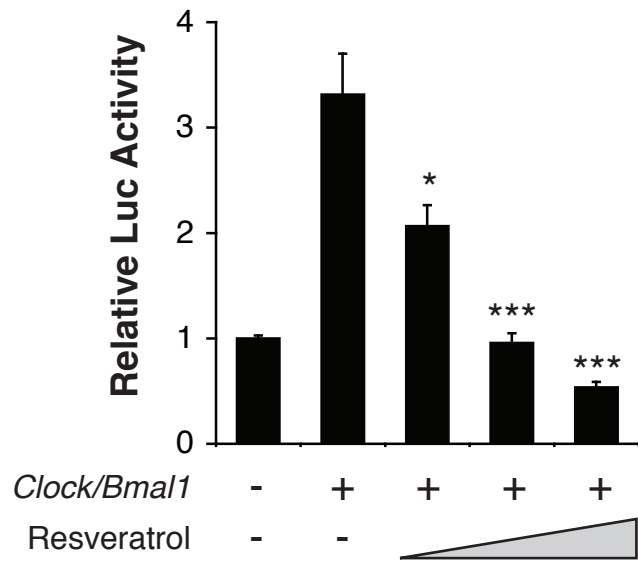**B**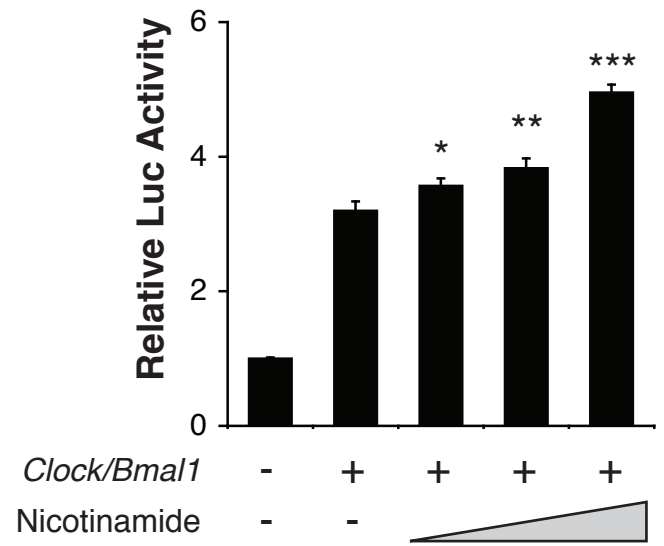**C**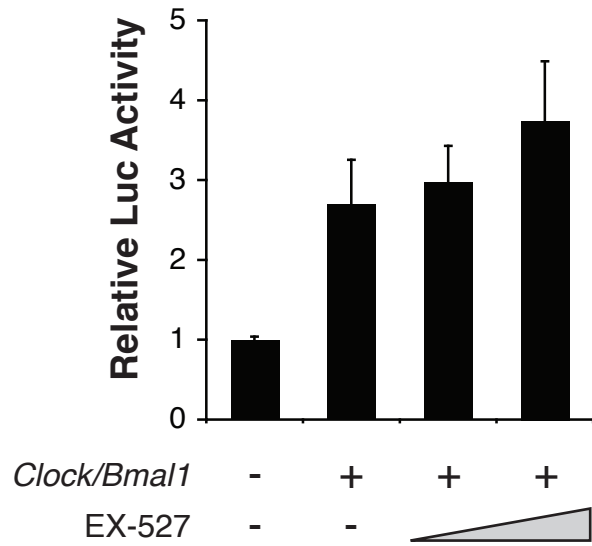**Figure S3**

Supplement: NIHMS128744-supplement-Figure_S3.pdf [file NIHMS128744-supplement-Figure_S3.pdf]

### HEK293 (Co-Immunoprecipitation)

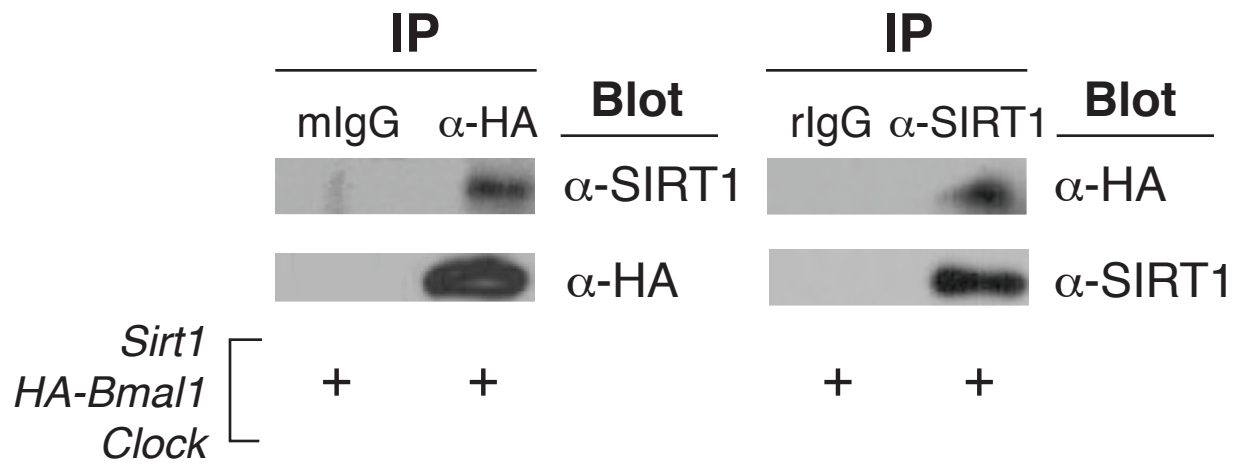

Figure S4

Supplement: NIHMS128744-supplement-Figure_S4.pdf [file NIHMS128744-supplement-Figure_S4.pdf]

## *Nampt* upstream region

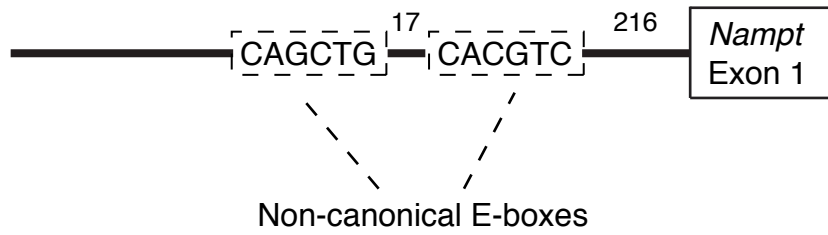

## *Nampt* intron 1

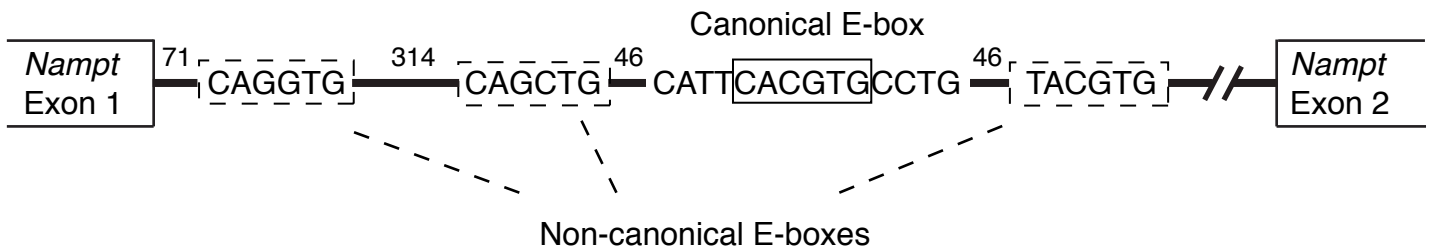

Figure S5

Supplement: NIHMS128744-supplement-Figure_S5.pdf [file NIHMS128744-supplement-Figure_S5.pdf]

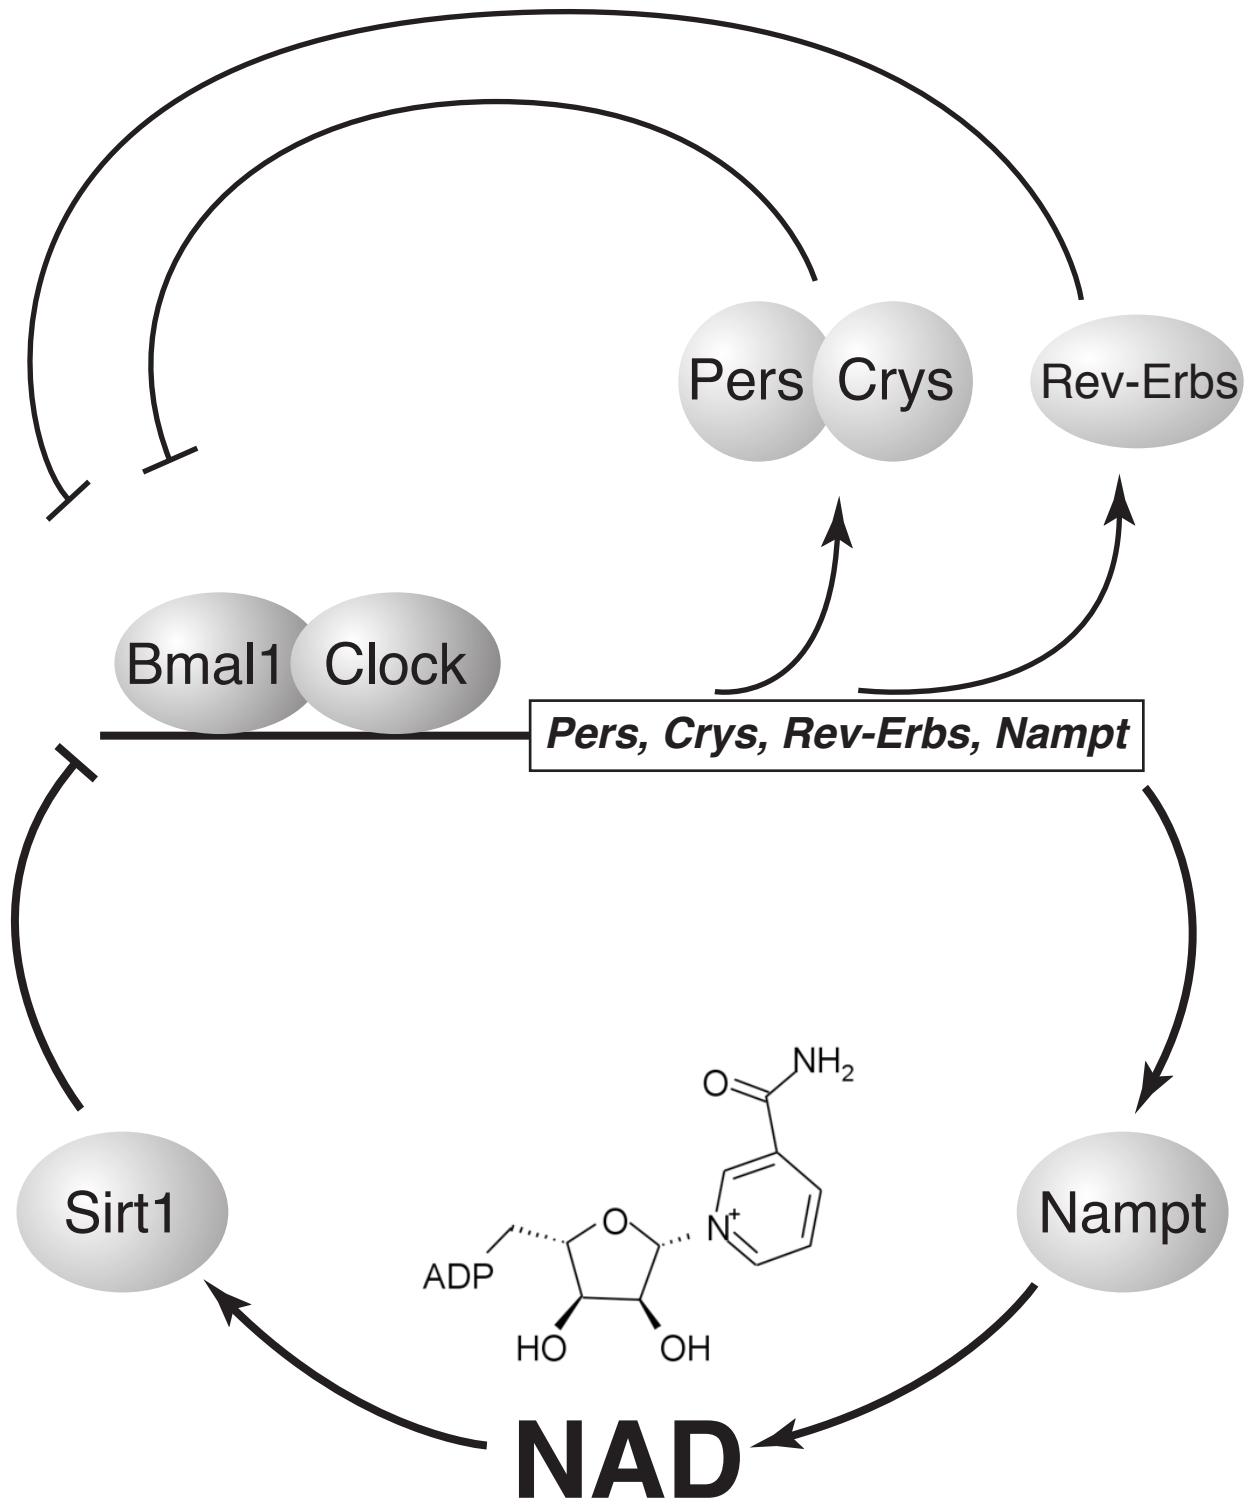

Figure S6

Supplement: NIHMS128744-supplement-Figure_S6.pdf [file NIHMS128744-supplement-Figure_S6.pdf]
